# Supplementary material
Source: PubMed Central journal article supplement (PMC8238734)
Supplement: 420_2021_1655_MOESM1_ESM.pdf [file 420_2021_1655_MOESM1_ESM.pdf]

# Excessive Fatigue Symptom Inventory

In the past 6 months, how often did you experience the following symptoms? Please circle the response that comes closest to how you feel.

|    |                                                                                | Never | Rarely | Sometimes | Frequently |
|----|--------------------------------------------------------------------------------|-------|--------|-----------|------------|
| 1  | Abnormal sweat                                                                 | 1     | 2      | 3         | 4          |
| 2  | Severe back and shoulder pain                                                  | 1     | 2      | 3         | 4          |
| 3  | Face flushing                                                                  | 1     | 2      | 3         | 4          |
| 4  | Chest pain and oppressive feeling                                              | 1     | 2      | 3         | 4          |
| 5  | Breathing difficulties                                                         | 1     | 2      | 3         | 4          |
| 6  | Repeatedly vomiting                                                            | 1     | 2      | 3         | 4          |
| 7  | Heart palpitation                                                              | 1     | 2      | 3         | 4          |
| 8  | Numbness of arm and leg                                                        | 1     | 2      | 3         | 4          |
| 9  | Sudden blindness                                                               | 1     | 2      | 3         | 4          |
| 10 | Heavy headache and dizziness                                                   | 1     | 2      | 3         | 4          |
| 11 | Slurring words                                                                 | 1     | 2      | 3         | 4          |
| 12 | Heavy toothache                                                                | 1     | 2      | 3         | 4          |
| 13 | Emotionally arguing with someone (e.g, boss, coworkers, clients, and families) | 1     | 2      | 3         | 4          |
| 14 | Sudden unconsciousness                                                         | 1     | 2      | 3         | 4          |
| 15 | Unstoppable nosebleed                                                          | 1     | 2      | 3         | 4          |
| 16 | Difficulty in falling asleep at night                                          | 1     | 2      | 3         | 4          |
| 17 | Significant weight loss                                                        | 1     | 2      | 3         | 4          |
| 18 | Unrecoverable abnormal fatigue regardless of sleeping or resting               | 1     | 2      | 3         | 4          |
| 19 | Abnormal sleepiness                                                            | 1     | 2      | 3         | 4          |
| 20 | Becoming short temper                                                          | 1     | 2      | 3         | 4          |
| 21 | Losing one's appetite                                                          | 1     | 2      | 3         | 4          |
| 22 | Frequently thinking about quitting one's job                                   | 1     | 2      | 3         | 4          |
| 23 | Spending one's days off sleeping                                               | 1     | 2      | 3         | 4          |
| 24 | Going to bed immediately after work due to exhaustion                          | 1     | 2      | 3         | 4          |
| 25 | Difficulty in awakening from sleep                                             | 1     | 2      | 3         | 4          |
| 26 | Becoming unable to perform daily activities                                    | 1     | 2      | 3         | 4          |
